# Supplementary material for: NIR spectroscopy as a PAT tool for the extraction process of Gegen Qinlian Decoction: end-point determination and fault detection
Source: Royal Society of Chemistry journal article supplement (doi:10.1039/d3nj03085g), 2023-01-01
Supplement: d3nj03085g1.pdf [file d3nj03085g1.pdf]

## Visualization for the “black-box” extraction process of Gegen Qinlian

### Decoction based on near-infrared spectroscopy

Sijun Wu <sup>a,b</sup>, Guoming Zhou <sup>a,b</sup>, Xiaoyang Zhang <sup>a,b</sup>, Guangpu Fang <sup>a</sup>, Jiahe Qian <sup>a</sup>, Kun Zhang <sup>c</sup>, Wenlong Li <sup>a,b,d\*</sup>

<sup>a</sup> College of Pharmaceutical Engineering of Traditional Chinese Medicine, Tianjin University of Traditional Chinese Medicine, Tianjin, 301617, China;

<sup>b</sup> State key Laboratory of Component-based Chinese Medicine, Tianjin University of Traditional Chinese Medicine, Tianjin, 301617, China;

<sup>c</sup> Sichuan Puhua TCM Technology Co., Ltd, Sichuan, 611135, China;

<sup>d</sup> Haihe Laboratory of Modern Chinese Medicine, Tianjin, 301617, China

---

\* Corresponding author (Wenlong Li). *E-mail address:* [wshlwl@tjutcm.edu.cn](mailto:wshlwl@tjutcm.edu.cn)

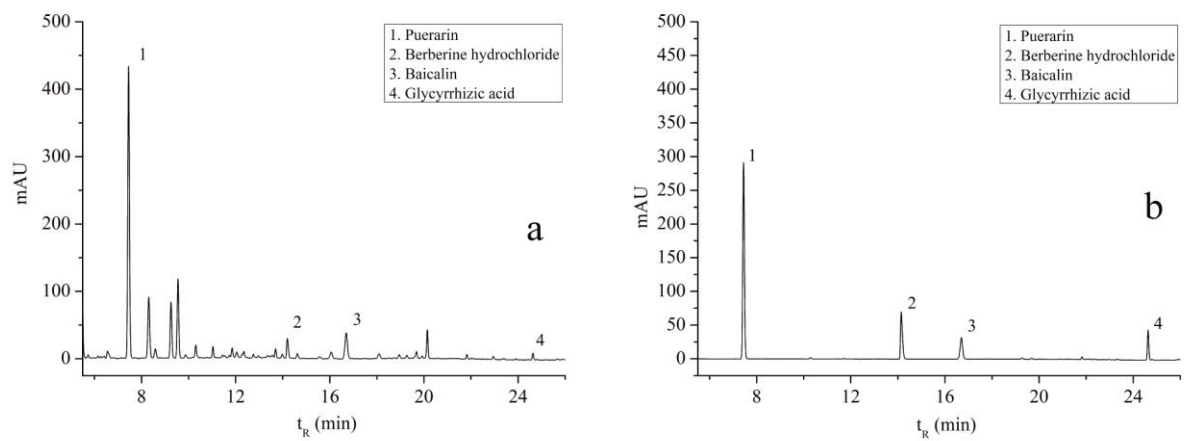

**Fig. S1.** Representative chromatograms of extracted solution and reference solution. (a) Extracted solution. (b) Reference solution.

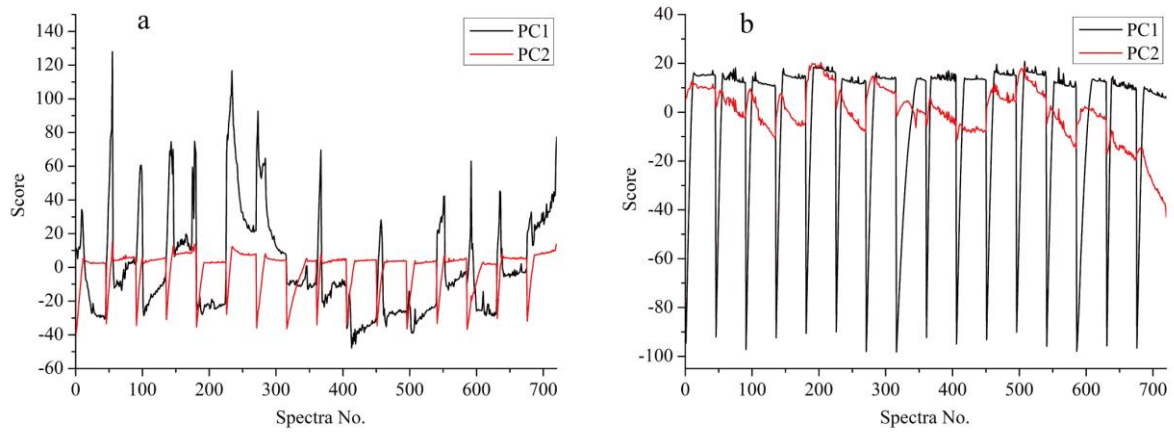

**Fig. S2.** Scores of the first two principal components of near-infrared spectral data. (a) Without preprocessing. (b) Preprocessing with SNV.

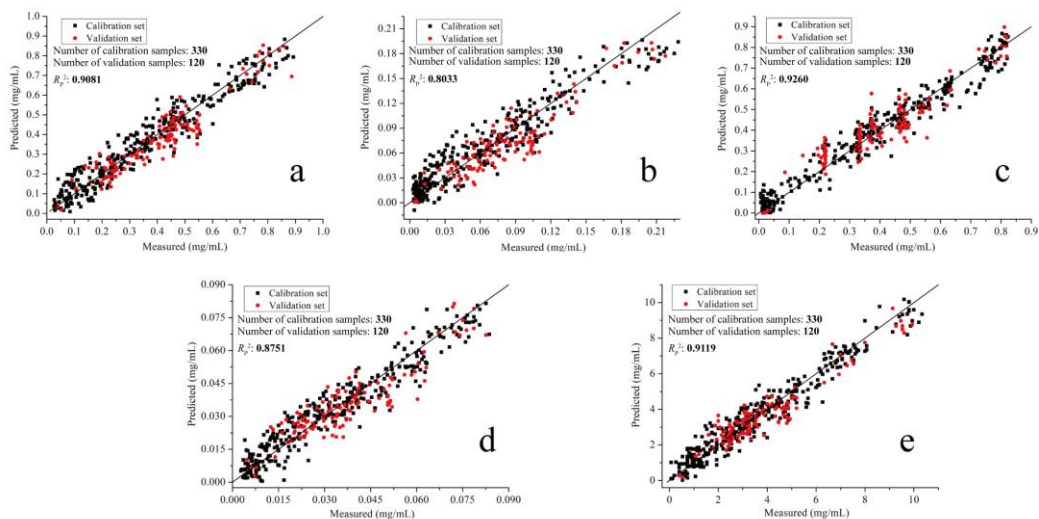

**Fig. S3.** Correlation diagrams of measured values vs. predictions of CARS-PLS regression models for the components and soluble solids. (a) Puerarin. (b) Berberine hydrochloride. (c) Baicalin. (d) Glycyrrhizic acid. (e) Soluble solids.

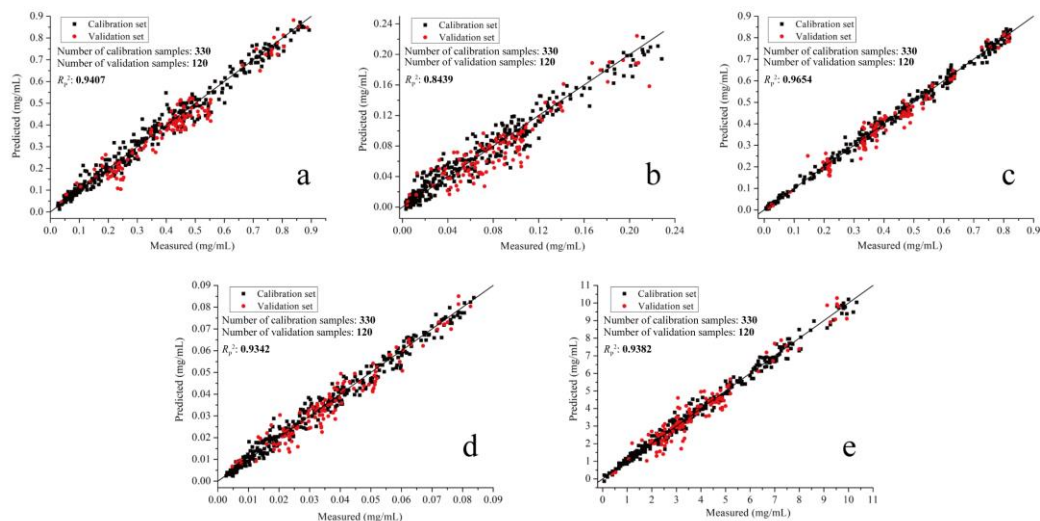

**Fig. S4.** Correlation diagrams of measured values vs. predictions of GP regression models for the components and soluble solids. (a) Puerarin. (b) Berberine hydrochloride. (c) Baicalin. (d) Glycyrrhizic acid. (e) Soluble solids.

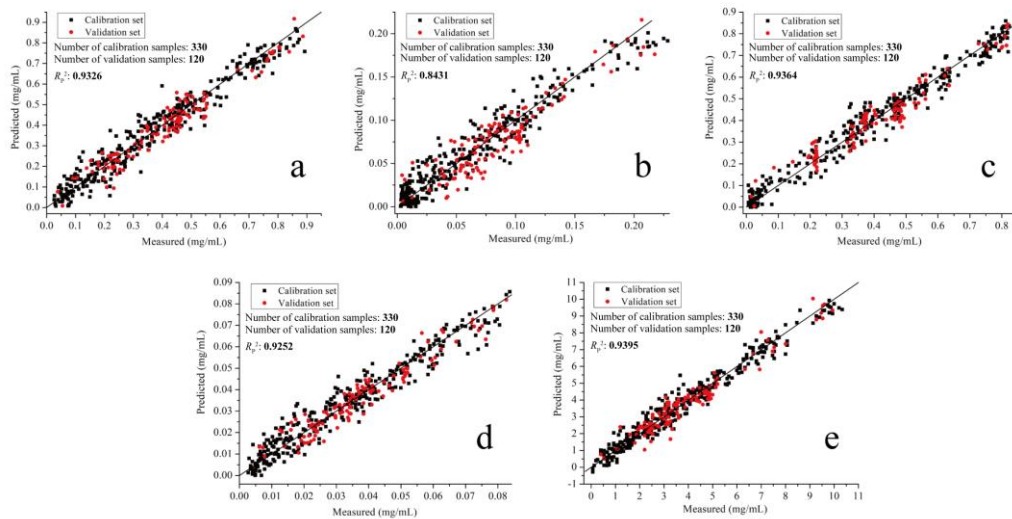

**Fig. S5.** Correlation diagrams of measured values vs. predictions of ELM models. (a) Puerarin. (b) Berberine hydrochloride. (c) Baicalin. (d) Glycyrrhizic acid. (e) Soluble solids.

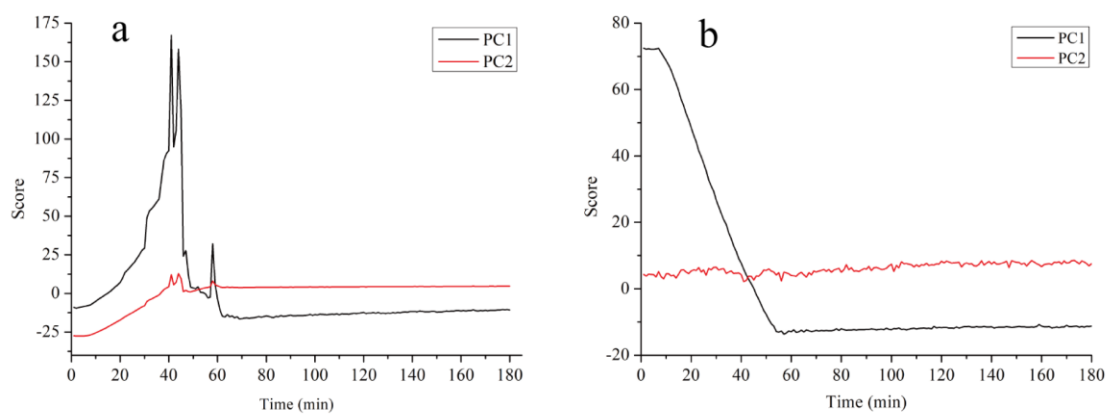

**Fig. S6.** Scores of the first two principal components of NIR spectral data. (a) Without preprocessing. (b) Preprocessing with 1st der.

**Table S1** Optimization of spectral preprocessing methods for four types of components and soluble solids

| Preprocessing methods       | Puerarin |                | Berberine hydrochloride |                | Baicalin |                | Glycyrrhizic acid |                | Soluble solids |                |
|-----------------------------|----------|----------------|-------------------------|----------------|----------|----------------|-------------------|----------------|----------------|----------------|
|                             | PCs      | RMSECV (mg/mL) | PCs                     | RMSECV (mg/mL) | PCs      | RMSECV (mg/mL) | PCs               | RMSECV (mg/mL) | PCs            | RMSECV (mg/mL) |
| Raw spectra                 | 9        | 0.0704         | 11                      | 0.0166         | 9        | 0.0657         | 5                 | 0.0095         | 11             | 0.5451         |
| MSC                         | 8        | 0.0639         | 9                       | 0.0197         | 10       | 0.0565         | 8                 | 0.0063         | 9              | 0.6183         |
| SNV                         | 9        | 0.0555         | 9                       | 0.0185         | 9        | 0.0530         | 9                 | 0.0063         | 9              | 0.4314         |
| 1st derivative              | 5        | 0.0920         | 5                       | 0.0286         | 6        | 0.0996         | 5                 | 0.0100         | 5              | 1.0240         |
| SG smoothing                | 9        | 0.0737         | 11                      | 0.0217         | 7        | 0.0779         | 9                 | 0.0076         | 9              | 0.7927         |
| SNV-SG smoothing            | 8        | 0.0775         | 8                       | 0.0241         | 9        | 0.0768         | 8                 | 0.0087         | 9              | 0.8275         |
| 1st derivative-SG smoothing | 5        | 0.1040         | 3                       | 0.0316         | 4        | 0.1158         | 3                 | 0.1160         | 5              | 1.2037         |
| SNV-1st derivative          | 6        | 0.0871         | 5                       | 0.0272         | 5        | 0.0937         | 5                 | 0.0095         | 5              | 0.9667         |



**Table S2** Number of selected variables using the three kinds of methods

| Ingredients             | Methods | Number of variables |
|-------------------------|---------|---------------------|
| Puerarin                | None    | 1007                |
|                         | UVE     | 94                  |
|                         | SPA     | 34                  |
|                         | CARS    | 87                  |
| Berberine hydrochloride | None    | 1007                |
|                         | UVE     | 78                  |
|                         | SPA     | 19                  |
|                         | CARS    | 60                  |
| Baicalin                | None    | 974                 |
|                         | UVE     | 82                  |
|                         | SPA     | 33                  |
|                         | CARS    | 105                 |
| Glycyrrhizic acid       | None    | 1007                |
|                         | UVE     | 91                  |
|                         | SPA     | 20                  |
|                         | CARS    | 98                  |
| Soluble solids          | None    | 1007                |
|                         | UVE     | 82                  |
|                         | SPA     | 27                  |
|                         | CARS    | 127                 |
